# Supplementary material for: Task-Based Functional Connectivity in Attention-Deficit/Hyperactivity Disorder: A Systematic Review
Source: PubMed Central journal article supplement — Biol Psychiatry Glob Open Sci. 2021 Oct 28;2(4):350–67. doi: 10.1016/j.bpsgos.2021.10.006 (PMC9616264; doi:10.1016/j.bpsgos.2021.10.006), 2021-10-28
Supplement: mmc1.pdf [file mmc1.pdf]

## ***Supplemental Information for***

### **Task-based Functional Connectivity in Attention-Deficit/Hyperactivity Disorder: A Systematic Review**

#### **Investigations of functional connectivity in persisters/remitters, non-symptomatic siblings, and in relation to symptom severity**

Studies identified in this systematic review comparing youth with ADHD with their non-symptomatic siblings tested inhibition-related functional connectivity differences (1,2), while studies comparing persisters and remitters focused on attention-related connectivity (3,4; Table 2 in the main text of the manuscript). Relative to non-symptomatic siblings, individuals with ADHD exhibited decreased connectivity of the striatum and increased connectivity of medial frontal/anterior cingulate and cerebellar regions. Additionally, both increases and decreases of connectivity have been observed across inferior and superior frontal cortex, middle temporal gyrus, sensorimotor, and parieto-occipital areas. Persistent ADHD was associated with lower connectivity of various fronto-striato-thalamic regions and greater connectivity of sensorimotor and middle frontal areas relative remitted ADHD. Across both comparison groups and both attention and inhibition paradigms, the right striatum emerged as a hub of decreased connectivity, while the precentral gyrus exhibited increased connectivity in ADHD compared to siblings/remitters. Finally, the right frontal pole showed both increases and decreases of functional connectivity in ADHD across all comparisons, with a 1:1 ratio.

One study tested the association between functional connectivity and symptom severity in adults with ADHD observing a negative relationship between ADHD severity and the connectivity between the left intraparietal sulcus and the right IFC, SFG, and postcentral gyrus (5).

**Impact of sex, age, clinical presentations, and comorbidities on the ADHD imaging literature**

A number of patient-specific characteristics can impact on the findings emerging from the reviewed literature of task-based functional connectivity in ADHD. Sex differences, while prevalent in ADHD, are a relatively unexplored source of potential variability in the neuroimaging literature of ADHD. ADHD is more often diagnosed in males than females (6,7), which leads to a general male predominance of ADHD in both the clinic and in research (8). Sex differences have been observed in direct comparison studies of fMRI activation (9,10), as well as in a meta-regression analysis, showing that a greater number of females was related to greater hypoactivation in the left-hemispheric cerebellar and occipital regions during working memory (11). On the other hand, a well-powered study of inhibition-related brain activation and functional connectivity showed no sex differences in youth with ADHD (1,12). With regards to resting-state studies, mixed findings emerged, with some studies observing distinct sex-dependent patterns of connectivity in children (13) and adults (14) with ADHD, while others not observing differences (15). Although more research is needed to characterise sex differences in ADHD, the available literature indicates potential influence of sex on brain function in ADHD.

The imaging literature of ADHD is also dominated by paediatric cases, with considerably fewer studies focusing on adult ADHD. This was also reflected in the current review, with more than 2/3 of the included articles recruiting young people with ADHD. While ADHD was once considered a childhood disorder, it is now recognised that approximately 65-80% of childhood cases persist into adulthood (16–18) resulting in a prevalence of 2.5-5% of adults in the general population (19–24). Although there is evidence suggesting that adult ADHD is associated with similar neurofunctional deficits as paediatric ADHD (25–29), these abnormalities might be more pronounced in childhood (30–33). Nevertheless, further research is needed to better understand the neurofunctional developmental trajectories of ADHD.

Interpretation of findings emerging from fMRI ADHD research is further complicated by the variability of clinical presentation and high degree of comorbidity with other psychiatric and neurodevelopmental conditions (34–37). Studies of ADHD neurocognition, including those reviewed here, tend to primarily recruit patients with combined or inattentive presentation. This is often motivated by greater clinical prevalence of those presentations (24) and the high susceptibility of fMRI techniques to motion artefacts. Excessive motion is a recognised issue in neuroimaging in ADHD. Exclusion due to inability to complete the protocol or excessive motion during scanning may theoretically bias the included groups to those with lower hyperactivity symptoms. Most studies included in the current review do not report ADHD presentation beyond average symptoms, with combined type making up the majority of those included (72% of participants across all reviewed studies). One larger study included in this review ( $N_{\text{ADHD}} = 185$ ;  $N_{\text{control}} = 124$ ) reporting exclusions described 5% of the ADHD sample and 1% of the control sample being excluded due to excessive motion, but did not indicate if those excluded had a particular ADHD presentation (1). Overall, the bias towards samples with low hyperactivity symptoms in neuroimaging studies, combined with the evidence of distinct presentation-dependent cognitive (38–40) and neurofunctional (11,41–43) abnormalities urges caution in extrapolating findings from one clinical presentation to ADHD as a whole.

With regard to the impact of comorbidities, although there is evidence of disorder-specific inferior frontal cortex hypoactivation in ADHD relative to obsessive compulsive (31), autism spectrum (44), conduct (45), and paediatric bipolar disorders (46) during inhibition, this distinction is not as clear in other brain regions or during other cognitive functions. Shared deficits between ADHD and autism spectrum disorder have been observed in dorsolateral prefrontal, striato-thalamic, and superior parietal regions during sustained attention (47) and in the insula during response inhibition (44). Similarly, during sustained attention, both ADHD and obsessive-compulsive disorder were associated with hypoactivation in the insula, inferior frontal cortex, and cerebellum

(48). Shared dysfunction has also been observed during tasks of 'hot' executive functions in fronto-striatal regions compared to obsessive compulsive disorder (48,49) and in fronto-temporal regions relative to autism spectrum disorder (50). Consequently, although there is evidence that the disorder-specific neurofunctional impairment in ADHD may be context-dependent, with more distinct abnormalities during response inhibition, the wealth of evidence of shared dysfunction across other psychiatric disorders invites caution in the interpretation of results arising from comorbid populations.

These factors merely reflect the state and trend of the fMRI ADHD literature. Future studies will have to address these gaps by focusing on females with ADHD and by having a more comprehensive investigation of the development of ADHD through age. Finally, the impact of ADHD presentations and comorbidities will need more specific investigation to disentangle the general impairments observed in ADHD from the specific effects of the different presentations and comorbidities.

**Cochrane risk of bias summary figure (51)**

|       |                         | Risk of bias |    |    |    |    |
|-------|-------------------------|--------------|----|----|----|----|
|       |                         | D1           | D2 | D3 | D4 | D5 |
| Study | Mowinckel et al. (2017) |              |    |    |    |    |
|       | Posner et al. (2011)    |              |    |    |    |    |
|       | Querne et al. (2017)    |              |    |    |    |    |
|       | Rubia et al. (2009)     |              |    |    |    |    |
|       | Rubia et al. (2019)     |              |    |    |    |    |
|       | Schulz et al. (2018)    |              |    |    |    |    |
|       | Sheridan et al. (2010)  |              |    |    |    |    |
|       | Wong & Stevens (2012)   |              |    |    |    |    |
|       | Wu et al. (2017)        |              |    |    |    |    |

D1: Selection bias  
D2: Performance bias  
D3: Detection bias  
D4: Attrition bias  
D5: Reporting bias

Judgement  
 High  
 Unclear  
 Low

**List of publications included in the systematic review:**

1. Bedard, A.-C.V., Newcorn, J.H., Clerkin, S.M., Krone, B., Fan, J., Halperin, J.M., & Schulz, K.P. (2014). Reduced prefrontal efficiency for visuospatial working memory in attention-deficit/hyperactivity disorder. *Journal of the American Academy of Child and Adolescent Psychiatry*, 53(9), 1020. <https://doi.org/10.1016/j.jaac.2014.05.011>
2. Cai, W., Griths, K., Korgaonkar, M.S., Williams, L.M., & Menon, V. (2019). Inhibition-related modulation of salience and frontoparietal networks predicts cognitive control ability and inattention symptoms in children with ADHD. *Molecular Psychiatry*. <https://doi.org/10.1038/s41380-019-0564-4>
3. Ceceli, A.O., Natsheh, J.Y., Cruz, D., & Tricomi, E. (2020). The neurobehavioral mechanisms of motivational control in attention-deficit/hyperactivity disorder. *Cortex*, 127, 191-207. <https://doi.org/10.1016/j.cortex.2020.02.009>
4. Chevrier, A., Bhajjiwala, M., Lipszyc, J., Cheyne, D., Graham, S., & Schachar, R. (2019). Disrupted reinforcement learning during post-error slowing in ADHD. *PLoS One*, 14(2). <https://doi.org/10.1371/journal.pone.0206780>
5. Clerkin, S.M., Schulz, K.P., Berwid, O.G., Fan, J., Newcorn, J.H., Tang, C.Y., & Halperin, J.M. (2013). Thalamo-cortical activation and connectivity during response preparation in adults with persistent and remitted ADHD. *American Journal of Psychiatry*, 170(9), 1011-1019. <https://doi.org/10.1176/appi.ajp.2013.12070880>
6. Cubillo, A., Halari, R., Ecker, C., Giampietro, V., Taylor, E., & Rubia, K. (2010). Reduced activation and inter-regional functional connectivity of fronto-striatal networks in adults with childhood attention-deficit/hyperactivity disorder (ADHD) and persisting symptoms during tasks of motor inhibition and cognitive switching. *Journal of Psychiatric Research*, 44(10), 629-639. <https://doi.org/10.1016/j.jpsychires.2009.11.016>
7. Hafeman, D., Bebeko, G., Bertocci, M.A., Fournier, J.C., Chase, H.W., Bonar, L., Perlman, S.B., Travis, M., Gill, M.K., Diwadkar, V.A., Sunshine, J.L., Holland, S.K., Kowatch, R.A., Birmaher, B., Axelson, D., Horwitz, S.M., Arnold, L.E., Fristad, M.A., Frazier, T.W., ..., Phillips, M.L. (2017). Amygdala-prefrontal cortical functional connectivity during implicit emotion processing differentiates youth with bipolar spectrum from youth with externalizing disorders. *Journal of Affective Disorders*, 208, 94-100. <https://doi.org/10.1016/j.jad.2016.09.064>
8. Hwang, S., White, S.F., Nolan, Z.T., Williams, C.W., Sinclair, S., & Blair, R.J.R. (2015). Executive attention control and emotional responding in attention-deficit/hyperactivity disorder - A functional MRI study. *NeuroImage Clinical*, 9, 545-554. <https://doi.org/10.1016/j.nicl.2015.10.005>
9. Kolodny, T., Mevorach, C., Stern, P., Biderman, N., Ankaoua, M., Tsafrir, S., & Shalev, L. (2020). Fronto-parietal engagement in response inhibition is inversely scaled with attention-deficit/hyperactivity disorder symptom severity. *NeuroImage Clinical*, 25, 102119. <https://doi.org/10.1016/j.nicl.2019.102119>
10. Li, X., Sroubek, A., Kelly, M.S., Lesser, I., Sussman, E., He, Y., Branch, C., & Foxe, J.J. (2012). Atypical pulvinar-cortical pathways during sustained attention performance in children with attention-deficit/hyperactivity disorder. *Journal of the American Academy of Child and Adolescent Psychiatry*, 51(11), 1197. <https://doi.org/10.1016/j.jaac.2012.08.013>

11. Luo, Y., Schulz, K.P., Alvarez, T.L., Halperin, J.M., & Li, X. (2018). Distinct topological properties of cue-evoked attention processing network in persisters and remitters of childhood ADHD. *Cortex*, 109, 234-244. <https://doi.org/10.1016/j.cortex.2018.09.013>
12. Ma, I., van Holstein, M., Mies, G.W., Mennes, M., Buitelaar, J., Cools, R., Cillensen, A.H.N., Krebs, R.M., & Scheres, A. (2016). Ventral striatal hyperconnectivity during rewarded interference control in adolescents with ADHD. *Cortex*, 82, 225-236. <https://doi.org/10.1016/j.cortex.2016.05.021>
13. Massat, I., Slama, H., Kavec, M., Linotte, S., Mary, A., Baleriaux, D., Metens, T., Mendlewicz, J., & Peigneux, P. (2012). Working memory-related functional brain patterns in never medicated children with ADHD. *PLoS One*, 7(11), e49392. <https://doi.org/10.1371/journal.pone.0049392>
14. Massat, I., Slama, H., Villemonteix, T., Mary, A., Baijot, S., Albajara Saenz, A., Baleriaux, D., Metens, T., Kavec, M., & Peigneux, P. (2018). Hyperactivity in motor response inhibition networks in unmedicated children with attention-deficit/hyperactivity disorder. *World Journal of Biological Psychiatry*, 19(2), 101-111. <https://doi.org/10.1080/15622975.2016.1237040>
15. Mowinckel, A.M., Alnaes, D., Pedersen, M.L., Ziegler, S., Fredriksen, M., Kaufmann, T., Sonuga-Barke, E., Endestad, T., Westlye, L.T., & Biele, G. (2017). Increased default-mode variability is related to reduced task-performance and is evident in adults with ADHD. *NeuroImage Clinical*, 16, 369-382. <https://doi.org/10.1016/j.nicl.2017.03.008>
16. Mulder, M.J., Van Belle, J., Van Engeland, H., & Durston, S. (2011). Functional connectivity between cognitive control regions is sensitive to familial risk for ADHD. *Human Brain Mapping*, 32(9), 1511-1518. <https://doi.org/10.1002/hbm.21141>
17. Park, B.-Y., Kim, M., Seo, J., Lee, J.-M., & Park, H. (2016). Connectivity analysis and feature classification in attention-deficit/hyperactivity disorder sub-types: A task functional magnetic resonance imaging study. *Brain Topography*, 29(3), 429-439. <https://doi.org/10.1007/s10548-015-0463-1>
18. Plessen, K.J., Allen, E.A., Eichele, H., van Wageningen, H., Hovik, M.F., Sorensen, L., Worren, M.K., Hugdahl, K., & Eichele, T. (2016). Reduced error signalling in medication-naive children with ADHD: Associations with behavioural variability and post-error adaptations. *Journal of Psychiatry and Neuroscience*, 41(2), 77-87. <https://doi.org/10.1503/jpn.140353>
19. Posner, J., Nagel, B.J., Maia, T.V., Mechling, A., Oh, M., Wang, Z., & Peterson, B.S. (2011). Abnormal amygdalar activation and connectivity in adolescents with attention-deficit/hyperactivity disorder. *Journal of the American Academy of Child and Adolescent Psychiatry*, 50(8), 828. <https://doi.org/10.1016/j.jaac.2011.05.010>
20. Querne, L., Fall, S., Le Moing, A.-G., Bourel-Ponchel, E., Delignieres, A., Simonnot, A., de Broca, A., Gondry-Jouet, C., Boucart, M., & Berquin, P. (2017). Effects of methylphenidate on default-mode network/task-positive network synchronization in children with ADHD. *Journal of Attention Disorders*, 21(14, SI), 1208-1220. <https://doi.org/10.1177/1087054713517542>
21. Rubia, K., Criaud, M., Wulff, M., Alegria, A., Brinson, H., Barker, G., Stahl, D., & Giampietro, V. (2019). Functional connectivity changes associated with fMRI neurofeedback of right inferior frontal cortex in adolescents with ADHD. *NeuroImage*, 188, 43-58. <https://doi.org/10.1016/j.neuroimage.2018.11.055>

22. Rubia, K., Halari, R., Cubillo, A., Mohammad, A., Brammer, M., & Taylor, E. (2009). Methylphenidate normalises activation and functional connectivity deficits in attention and motivation networks in medication-naïve children with ADHD during a rewarded continuous performance task. *Neuropharmacology*, 57(7-8), 640-652. <https://doi.org/10.1016/j.neuropharm.2009.08.013>
23. Schulz, K.P., Bedard, A.-C.V., Fan, J., Clerkin, S.M., Dima, D., Newcorn, J.H., & Halperin, J.M. (2014). Emotional bias of cognitive control in adults with childhood attention-deficit/hyperactivity disorder. *NeuroImage Clinical*, 5, 1-9. <https://doi.org/10.1016/j.nicl.2014.05.016>
24. Schulz, K.P., Krone, B., Adler, L.A., Bedard, A.-C.V., Duhoux, S., Pedraza, J., Mahagabin, S., & Newcorn, J.H. (2018). Lisdexamfetamine targets amygdala mechanisms that bias cognitive control in attention-deficit/hyperactivity disorder. *Biological Psychiatry: Cognitive Neuroscience and Neuroimaging*, 3(8), 686-693. <https://doi.org/10.1016/j.bpsc.2018.03.004>
25. Sheridan, M.A., Hinshaw, S., & D'Esposito, M. (2010). Stimulant medication and prefrontal functional connectivity during working memory in ADHD: A preliminary report. *Journal of Attention Disorders*, 14(1), 69-78. <https://doi.org/10.1177/1087054709347444>
26. Stoddard, J., Tseng, W.-L., Kim, P., Chen, G., Yi J., Donahue, L., Brotman, M.A., Towbin, K.E., Pine, D.S., & Leibenluft, E. (2017). Association of irritability and anxiety with the neural mechanisms of implicit face emotion processing in youths with psychopathology. *JAMA Psychiatry*, 74(1), 95-103. <https://doi.org/10.1001/jamapsychiatry.2016.3282>
27. Van Rooij, D., Hartman, C.A., Mennes, M., Oosterlaan, J., Franke, B., Rommelse, N., Heslenfeld, D., Faraone, S.V., Buitelaar, J.K., & Hoekstra, P.J. (2015). Altered neural connectivity during response inhibition in adolescents with attention-deficit/hyperactivity disorder and their unaffected siblings. *NeuroImage Clinical*, 7, 325-335. <https://doi.org/10.1016/j.nicl.2015.01.004>
28. Vloet, T.D., Gilsbach, S., Neufang, S., Fink, G.R., Herpertz-Dahlmann, B., & Konrad, K. (2010). Neural mechanisms of interference control and time discrimination in attention-deficit/hyperactivity disorder. *Journal of the American Academy of Child and Adolescent Psychiatry*, 49(4), 356-367. <https://doi.org/10.1097/00004583-201004000-00010>
29. von Rhein, D., Beckmann, C.F., Franke, B., Oosterlaan, J., Heslenfeld, D.J., Hoekstra, P.J., Hartman, C.A., Luman, M., Faraone, S.V., Cools, R., Buitelaar, J.K., & Mennes, M. (2017). Network-level assessment of reward-related activation in patients with ADHD and healthy individuals. *Human Brain Mapping*, 38(5), 2359-2369. <https://doi.org/10.1002/hbm.23522>
30. Wolf, R.C., Plichta, M.M., Sambataro, F., Fallgatter, A.J., Jacob, C., Lesch, K.-P., Herrmann, M.J., Schonfeldt-Lecuona, C., Connemann, B.J., Gron, G., & Vasic, N. (2009). Regional brain activation changes and abnormal functional connectivity of the ventrolateral prefrontal cortex during working memory processing in adults with attention-deficit/hyperactivity disorder. *Human Brain Mapping*, 30(7), 2252-2266. <https://doi.org/10.1002/hbm.20665>
31. Wong, C.G. & Stevens, M.C. (2012). The effects of stimulant medication on working memory functional connectivity in attention-deficit/hyperactivity disorder. *Biological Psychiatry*, 71(5), 458-466. <https://doi.org/10.1016/j.biopsych.2011.11.011>
32. Wu, Z.-M., Bralten, J., An, L., Cao, Q.-J., Cao, X.-H., Sun, L., Liu, L., Yang, L., Mennes, M., Zang, Y.-F., Franke, B., Hoogman, M., & Wang, Y.-F. (2017). Verbal working memory-related

- functional connectivity alterations in boys with attention-deficit/hyperactivity disorder and the effects of methylphenidate. *Journal of Psychopharmacology*, 31(8), 1061-1069. <https://doi.org/10.1177/0269881117715607>
33. Xia, S., Foxe, J.J., Sroubek, A.E., Branch, C., & Li, X. (2014). Topological organization of the 'small-world' visual attention network in children with attention deficit/hyperactivity disorder (ADHD). *Frontiers in Human Neuroscience*, 8, 162. <https://doi.org/10.3389/fnhum.2014.00162>
34. Zamorano, F., Billeke, P., Kausel, L., Larrain, J., Stecher, X., Hurtado, J.M., Lopez, V., Carrasco, X., & Aboitiz, F. (2017). Lateral prefrontal activity as a compensatory strategy for deficits of cortical processing in attention-deficit/hyperactivity disorder. *Scientific Reports*, 7. <https://doi.org/10.1038/s41598-017-07681-z>

## References

1. van Rooij D, Hartman CA, Mennes M, Oosterlaan J, Franke B, Rommelse N, *et al.* (2015): Altered neural connectivity during response inhibition in adolescents with Attention-Deficit/Hyperactivity Disorder and their unaffected siblings. *NeuroImage Clin* 7: 325–35.
2. Mulder MJ, van Belle J, van Engeland H, Durston S (2011): Functional connectivity between cognitive control regions is sensitive to familial risk for ADHD. *Hum Brain Mapp* 32: 1511–1518.
3. Clerkin SM, Schulz KP, Berwid OG, Fan J, Newcorn JH, Tang CY, Halperin JM (2013): Thalamo-cortical activation and connectivity during response preparation in adults with persistent and remitted ADHD. *Am J Psychiatry* 170: 1011–1019.
4. Luo Y, Schulz KP, Alvarez TL, Halperin JM, Li X (2018): Distinct topological properties of cue-evoked attention processing network in persisters and remitters of childhood ADHD. *CORTECH* 109: 234–244.
5. Kolodny T, Mevorach C, Stern P, Biederman N, Ankaoua M, Tsafirir S, Shalev L (2020): Fronto-parietal engagement in response inhibition is inversely scaled with attention-deficit/hyperactivity disorder symptom severity. *NeuroImage Clin* 25: 102119.
6. Polanczyk G, de Lima MS, Horta BL, Biederman J, Rohde LA (2007): The worldwide prevalence of ADHD: A systematic review and metaregression analysis. *Am J Psychiatry* 164: 942–948.
7. Skounti M, Philalithis A, Galanakis E (2007): Variations in prevalence of attention deficit hyperactivity disorder worldwide. *Eur J Pediatr* 166: 117–123.
8. Pereira-Sanchez V, Franco AR, Vieira D, de Castro-Manglano P, Soutullo C, Milham MP, Castellanos FX (2021): Systematic review: Medication effects on brain intrinsic functional connectivity in patients with attention-deficit/hyperactivity disorder. *J Am Acad Child Adolesc Psychiatry* 60. <https://doi.org/10.1016/j.jaac.2020.10.013>
9. Poissant H, Rapin L, Chenail S, Mendrek A (2016): Forethought in youth with attention deficit/hyperactivity disorder: An fMRI study of sex-specific differences. *Psychiatry J* 2016: 6810215.
10. Valera EM, Brown A, Biederman J, Faraone SV, Makris N, Monuteaux MC, *et al.* (2010): Sex differences in the functional neuroanatomy of working memory in adults with ADHD. *Am J Psychiatry* 167: 86–94.
11. McCarthy H, Skokauskas N, Frodl T (2014): Identifying a consistent pattern of neural function in Attention Deficit Hyperactivity Disorder: A meta-analysis. *Psychol Med* 44: 869–880.
12. van Rooij D, Hoekstra PJ, Mennes M, von Rhein D, Thissen AJAM, Heslenfeld D, *et al.* (2015):

- Neural activation patterns during response inhibition distinguish adolescents with ADHD, their unaffected siblings, and healthy controls. *Am J Psychiatry* 172: 674–683.
13. Rosch KS, Mostofsky SH, Nebel MB (2018): ADHD-related sex differences in fronto-subcortical intrinsic functional connectivity and associations with delay discounting. *J Neurodev Disord* 10. <https://doi.org/10.1186/s11689-018-9254-9>
  14. Park B, Park H (2016): Connectivity differences between adult male and female patients with attention deficit hyperactivity disorder according to resting-state functional MRI. *NEURAL Regen Res* 11: 119–125.
  15. Scofield JE, Johnson JD, Wood PK, Geary DC (2019): Latent resting-state network dynamics in boys and girls with attention-deficit/hyperactivity disorder. *PLoS One* 14. <https://doi.org/10.1371/journal.pone.0218891>
  16. Cheung CHM, Rijdsdijk F, McLoughlin G, Faraone SV, Asherson P, Kuntsi J (2015): Childhood predictors of adolescent and young adult outcome in ADHD. *J Psychiatr Res* 62: 92–100.
  17. Faraone SV, Biederman J, Mick E (2006): The age-dependent decline of attention-deficit/hyperactivity disorder: A meta-analysis of follow-up studies. *Psychol Med* 36: 159–165.
  18. van Lieshout M, Luman M, Twisk JWR, van Ewijk H, Groenman AP, Thissen AJAM, *et al.* (2016): A 6-year follow-up of a large European cohort of children with attention-deficit/hyperactivity disorder-combined subtype: Outcomes in late adolescence and young adulthood. *Eur Child Adolesc Psychiatry* 25: 1007–1017.
  19. Fayyad J, Sampson NA, Hwang I, Adamowski T, Aguilar-Gaxiola S, Al-Hamzawi A, *et al.* (2017): The descriptive epidemiology of DSM-IV adult ADHD in the World Health Organization World Mental Health Surveys. *Atten Deficit Hyperact Disord* 9: 47–65.
  20. Kessler R, Adler LA, Barkley RA, Biederman J, Conners CK, Demler O, *et al.* (2006): The prevalence and correlates of adult ADHD in the United States: results from the National Comorbidity Survey Replication. *Am J Psychiatry* 163: 716–723.
  21. Moffitt TE, Houts R, Asherson P, Belsky DW, Corcoran DL, Hammerle M, *et al.* (2015): Is adult ADHD a childhood-onset neurodevelopmental disorder? Evidence from a four-decade longitudinal cohort study. *Am J Psychiatry* 172: 967–977.
  22. Ramos-Quiroga JA, Nasillo V, Fernández-Aranda F, Casas M (2014): Addressing the lack of studies in attention-deficit/hyperactivity disorder in adults. *Expert Rev Neurother* 14: 553–567.
  23. Simon V, Czobor P, Bálint S, Mészáros Á, Bitter I (2009): Prevalence and correlates of adult attention-deficit hyperactivity disorder: Meta-analysis. *Br J Psychiatry* 194: 204–211.

24. Willcutt EG (2012): The prevalence of DSM-IV attention-deficit/hyperactivity disorder: A meta-analytic review. *Neurotherapeutics* 9: 490–499.
25. Cubillo AI, Halari R, Smith AB, Taylor E, Rubia K (2012): A review of fronto-striatal and fronto-cortical brain abnormalities in children and adults with attention deficit hyperactivity disorder (ADHD) and new evidence for dysfunction in adults with ADHD during motivation and attention. *Cortex* 48: 194–215.
26. Rubia K (2018): Cognitive neuroscience of Attention Deficit Hyperactivity Disorder (ADHD) and its clinical translation. *Front Hum Neurosci* 12: 100.
27. Cubillo A, Rubia K (2010): Structural and functional brain imaging in adult attention-deficit/hyperactivity disorder. *EXPERT Rev Neurother* 10: 603–620.
28. Cortese S, Kelly C, Chabernaud C, Proal E, Di Martino A, Milham MP, Castellanos FX (2012): Toward systems neuroscience of ADHD: A meta-analysis of 55 fMRI studies. *Am J Psychiatry* 169: 1038–1055.
29. Hart H, Radua J, Mataix-Cols D, Rubia K (2012): Meta-analysis of fMRI studies of timing in Attention-Deficit Hyperactivity Disorder (ADHD). *Neurosci Biobehav Rev* 36: 2248–2256.
30. Hart H, Radua J, Nakao T, Mataix-Cols D, Rubia K (2013): Meta-analysis of functional magnetic resonance imaging studies of inhibition and attention in Attention-Deficit/Hyperactivity Disorder. *JAMA Psychiatry* 70: 185.
31. Norman L, Carlisi C, Lukito S, Hart H, Mataix-Cols D, Radua J, Rubia K (2016): Structural and functional brain abnormalities in Attention-Deficit/Hyperactivity Disorder and Obsessive-Compulsive Disorder. *JAMA Psychiatry* 73: 815.
32. Rubia K, Norman L, Lukito S, Carlisi C, Mataix-Cols D, Radua J (2016): Top-down control in ADHD: Disorder-specificity relative to CD, Autism and OCD. *Eur Neuropsychopharmacol* 26: S149–S150.
33. Lei D, Du M, Wu M, Chen T, Huang X, Du X, *et al.* (2015): Functional MRI reveals different response inhibition between adults and children with ADHD. *Neuropsychology* 29: 874–881.
34. Antshel KM, Russo N (2019): Autism Spectrum Disorders and ADHD: Overlapping Phenomenology, Diagnostic Issues, and Treatment Considerations. *Curr Psychiatry Rep* 21: 34.
35. Connor DF, Steeber J, McBurnett K (2010): A review of Attention-Deficit/Hyperactivity Disorder complicated by symptoms of Oppositional Defiant Disorder or Conduct Disorder. *J Dev Behav Pediatr* 31: 427–440.
36. Simpson HA, Jung L, Murphy TK (2011): Update on Attention-Deficit/Hyperactivity Disorder

- and Tic Disorders: A review of the current literature. *Curr Psychiatry Rep* 13: 351–356.
37. van Emmerik-van Oortmerssen K, van de Glind G, van den Brink W, Smit F, Crunelle CL, Swets M, Schoevers RA (2012): Prevalence of Attention-Deficit Hyperactivity Disorder in substance use disorder patients: A meta-analysis and meta-regression analysis. *Drug Alcohol Depend* 122: 11–19.
38. Nigg JT, Blaskey LG, Huang-Pollock CL, Rappley MD (2002): Neuropsychological executive functions and DSM-IV ADHD subtypes. *J Am Acad Child Adolesc Psychiatry* 41: 59–66.
39. Nikolas MA, Nigg JT (2013): Neuropsychological performance and attention-deficit hyperactivity disorder subtypes and symptom dimensions. *Neuropsychology* 27: 107–120.
40. Willcutt EG, Nigg JT, Pennington BF, Solanto MV, Rohde LA, Tannock R, *et al.* (2012): Validity of DSM-IV attention-deficit/hyperactivity disorder symptom dimensions and subtypes. *J Abnorm Psychol* 121: 991–1010.
41. Saad JF, Griffiths KR, Korgaonkar MS (2020): A Systematic Review of Imaging Studies in the Combined and Inattentive Subtypes of Attention Deficit Hyperactivity Disorder. *Front Integr Neurosci* 14. <https://doi.org/10.3389/fnint.2020.00031>
42. dos Santos Siqueira A, Biazoli Junior CE, Comfort WE, Rohde LA, Sato JR (2014): Abnormal functional resting-state networks in ADHD: graph theory and pattern recognition analysis of fMRI data. *BioMed Res Int* 2014: 380531.
43. Fair DA, Nigg JT, Iyer S, Bathula D, Mills KL, Dosenbach NUF, *et al.* (2013): Distinct neural signatures detected for ADHD subtypes after controlling for micro-movements in resting state functional connectivity MRI data. *Front Syst Neurosci* 6: 80.
44. Lukito S, Norman L, Carlisi C, Radua J, Hart H, Simonoff E, Rubia K (In press): Comparative Meta-analyses of Brain Structural and Functional Abnormalities during Cognitive Control in Attention-Deficit/Hyperactivity Disorder and Autism Spectrum Disorder. *Psychological Medicine*.
45. Rubia K, Halari R, Smith AB, Mohammed M, Scott S, Giampietro V, *et al.* (2008): Dissociated functional brain abnormalities of inhibition in boys with pure Conduct Disorder and in boys with pure Attention Deficit Hyperactivity Disorder. *Am J Psychiatry* 165: 889–897.
46. Passarotti AM, Sweeney JA, Pavuluri MN (2010): Neural correlates of response inhibition in pediatric bipolar disorder and attention deficit hyperactivity disorder. *Psychiatry Res Neuroimaging* 181: 36–43.
47. Christakou A, Murphy CM, Chantiluke K, Cubillo AI, Smith AB, Giampietro V, *et al.* (2013): Disorder-specific functional abnormalities during sustained attention in youth with Attention Deficit Hyperactivity Disorder (ADHD) and with Autism. *Mol Psychiatry* 18: 236–

- 44.
48. Norman LJ, Carlisi CO, Christakou A, Cubillo AI, Murphy CM, Chantiluke K, *et al.* (2017): Shared and disorder-specific task-positive and default mode network dysfunctions during sustained attention in paediatric Attention-Deficit/Hyperactivity Disorder and Obsessive/Compulsive Disorder. *NeuroImage Clin* 15: 181–193.
49. Norman LJ, Carlisi CO, Christakou A, Murphy CM, Chantiluke K, Giampietro V, *et al.* (2018): Frontostriatal dysfunction during decision making in attention-deficit/hyperactivity disorder and obsessive-compulsive disorder. *Biol Psychiatry Cogn Neurosci Neuroimaging* 3: 694–703.
50. Chantiluke K, Christakou A, Murphy CM, Giampietro V, Daly EM, Ecker C, *et al.* (2014): Disorder-specific functional abnormalities during temporal discounting in youth with attention deficit hyperactivity disorder (ADHD), autism and comorbid ADHD and autism. *Psychiatry Res Neuroimaging* 223: 113–120.
51. Higgins JPT, Green S, The Cochrane Collaboration (2011): Cochrane Handbook for Systematic Reviews of Interventions Version 5.1.0 [updated March 2011]. Retrieved February 12, 2021, from [www.handbook.cochrane.org](http://www.handbook.cochrane.org)
